# Supplementary material
Source: MDPI journal article supplement (https://www.mdpi.com/2673-9976/6/1/24)
Supplement: s1 [file s1]

# Castanea sativa shells: Is cosmetic industry a prominent opportunity to valorise this agro-waste?

Diana Pinto<sup>1</sup>, María de la Luz Cádiz-Gurrea<sup>1</sup>, Vitor Freitas<sup>2</sup>, Paulo Costa<sup>3</sup>, Bruno Sarmento<sup>4,5</sup>, Cristina Delerue-Matos<sup>1</sup>, and Francisca Rodrigues<sup>1,\*</sup>

<sup>1</sup>REQUIMTE/LAQV - Polytechnic of Porto - School of Engineering, Portugal;

<sup>2</sup>REQUIMTE/LAQV, Department of Chemistry and Biochemistry, Faculty of Sciences, University of Porto, Portugal;

<sup>3</sup>REQUIMTE/UCIBIO, MedTech-Laboratory of Pharmaceutical Technology, Department of Drug Sciences, Faculty of Pharmacy, University of Porto, Portugal;

<sup>4</sup>i3S – Institute for Research and Innovation in Health, University of Porto, Portugal;

<sup>5</sup>CESPU – Institute for Research and Advanced Training in Health Sciences and Technologies, Gandra, Portugal.

\*francisca.rodrigues@graq.isep.ipp.pt

## INTRODUCTION

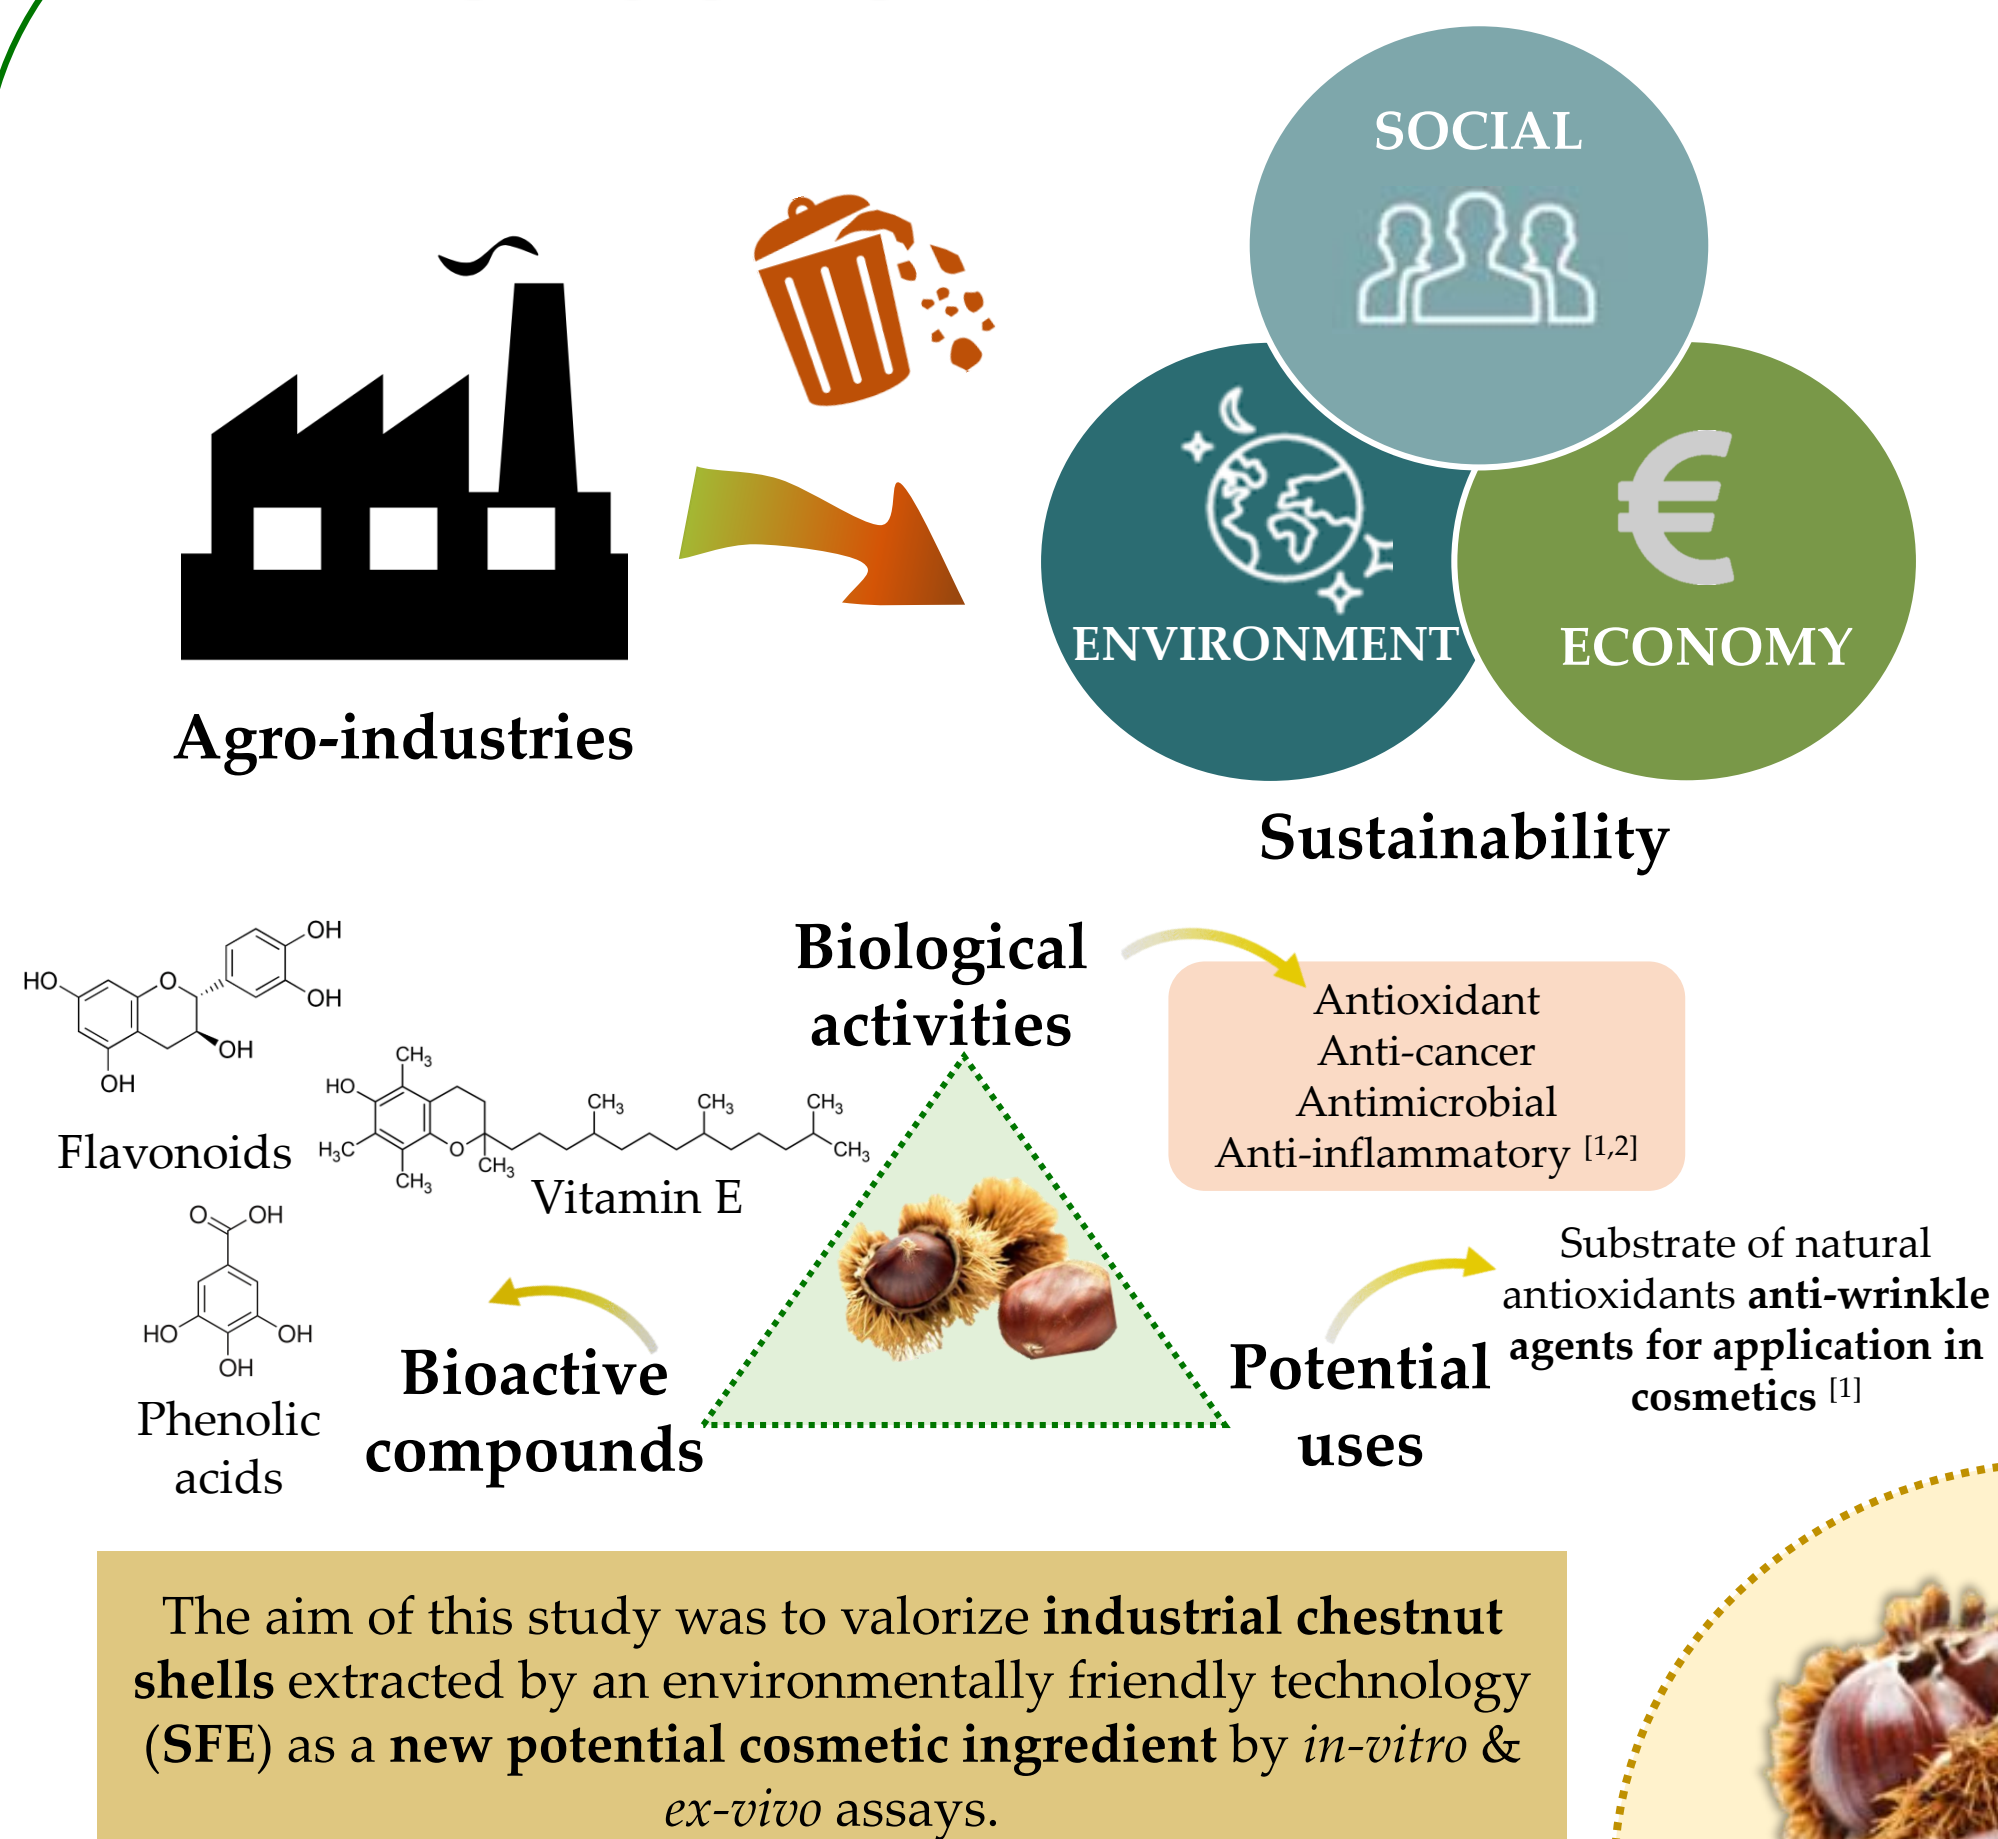

## MATERIALS & METHODS

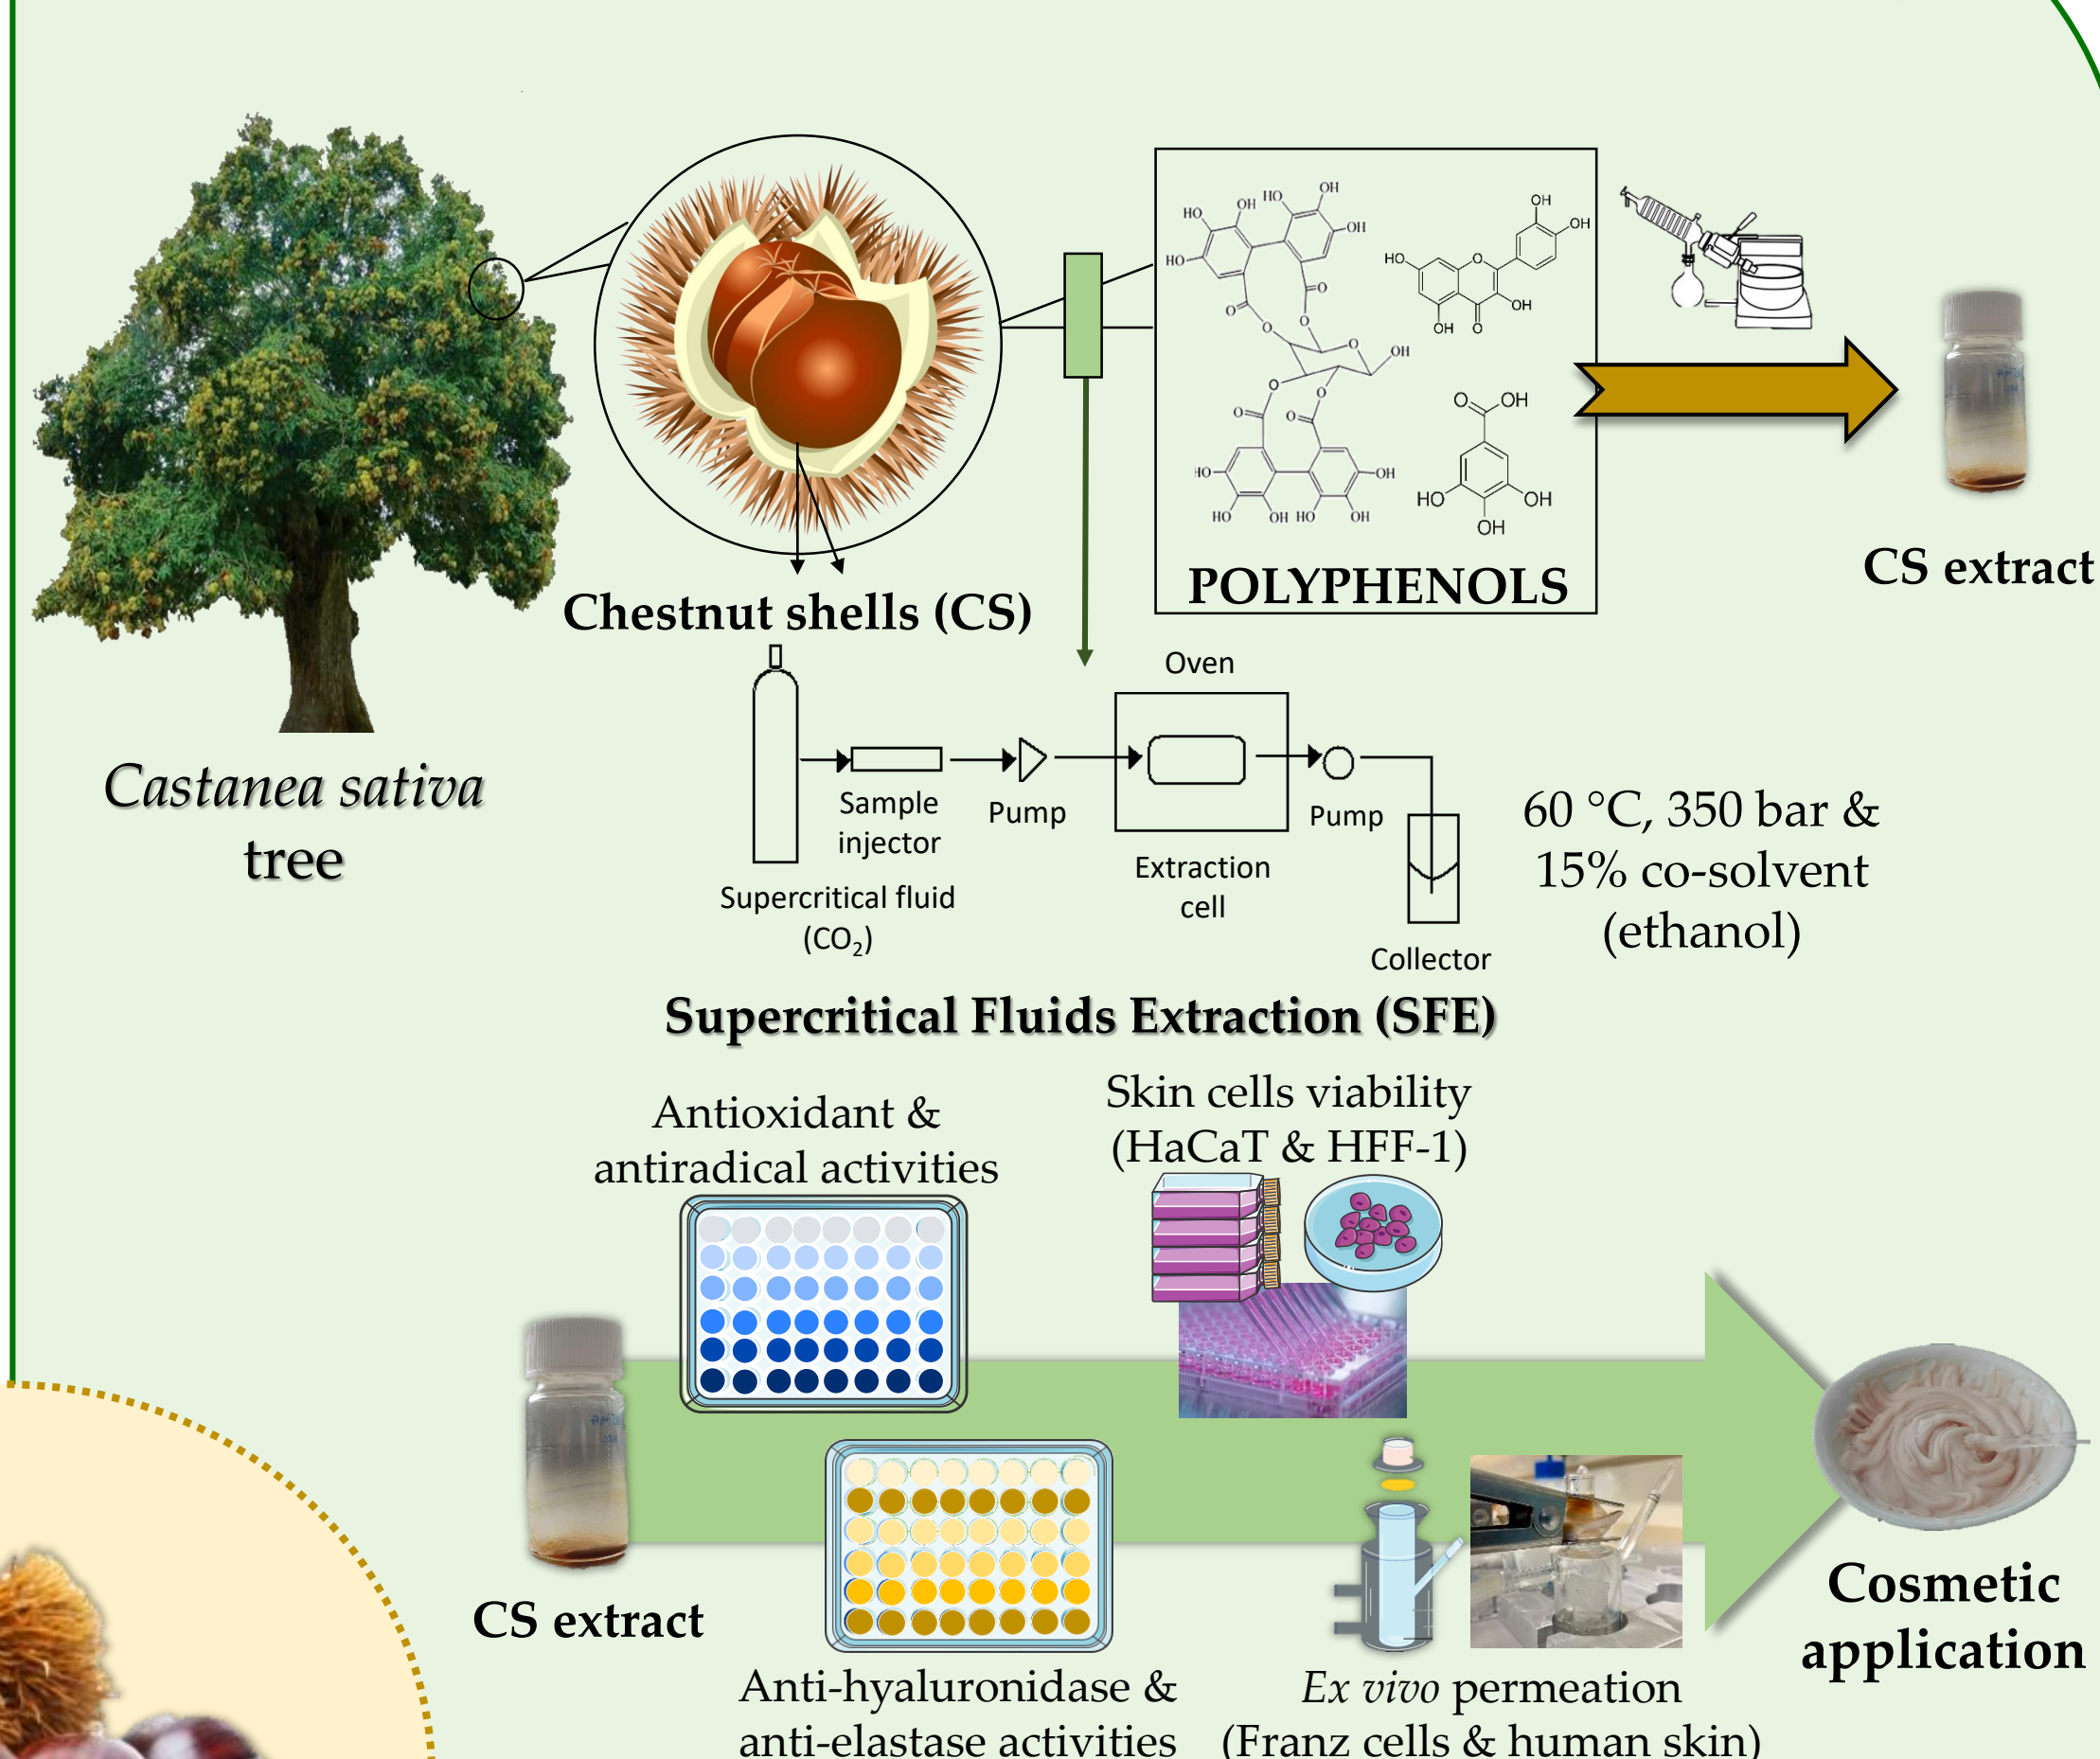

## RESULTS

### 1. In-vitro antioxidant/antiradical activities

Table 1. In-vitro antioxidant/antiradical activity & radicals scavenging capacity of CS extract prepared by SFE ( $n = 3$ ).

|             | FRAP<br>(IC <sub>50</sub> µg/mL) | DPPH<br>(% Inhibition) | ABTS<br>(mg AAE/g dw) <sup>1</sup> | O <sub>2</sub> <sup>•</sup><br>(IC <sub>50</sub> µg/mL) | HOCl<br>(IC <sub>50</sub> µg/mL) | NO <sup>•</sup><br>(IC <sub>50</sub> µg/mL) |
|-------------|----------------------------------|------------------------|------------------------------------|---------------------------------------------------------|----------------------------------|---------------------------------------------|
| CS extract  | 204.79 ± 4.33                    | 53.04 ± 6.75           | 124.84 ± 4.53                      | 49.42 ± 0.41 <sup>2a</sup>                              | 1.57 ± 0.10 <sup>a</sup>         | 0.76 ± 0.11 <sup>b</sup>                    |
| Catechin    | -                                | -                      | -                                  | 48.99 ± 0.75 <sup>b</sup>                               | 0.18 ± 0.01 <sup>c</sup>         | 0.95 ± 0.04 <sup>a</sup>                    |
| Gallic acid | -                                | -                      | -                                  | 5.18 ± 0.19 <sup>c</sup>                                | 1.25 ± 0.05 <sup>b</sup>         | 0.20 ± 0.03 <sup>c</sup>                    |

Different letters in the same column indicate significant differences ( $p < 0.05$ ).

### 2. Hyaluronidase & Elastase inhibitory activities

#### Hyaluronidase

IC<sub>50</sub> = 54.36 mg/mL

#### Elastase

33.56% inhibition (0.4 mg/mL)

### 3. Skin cells viability

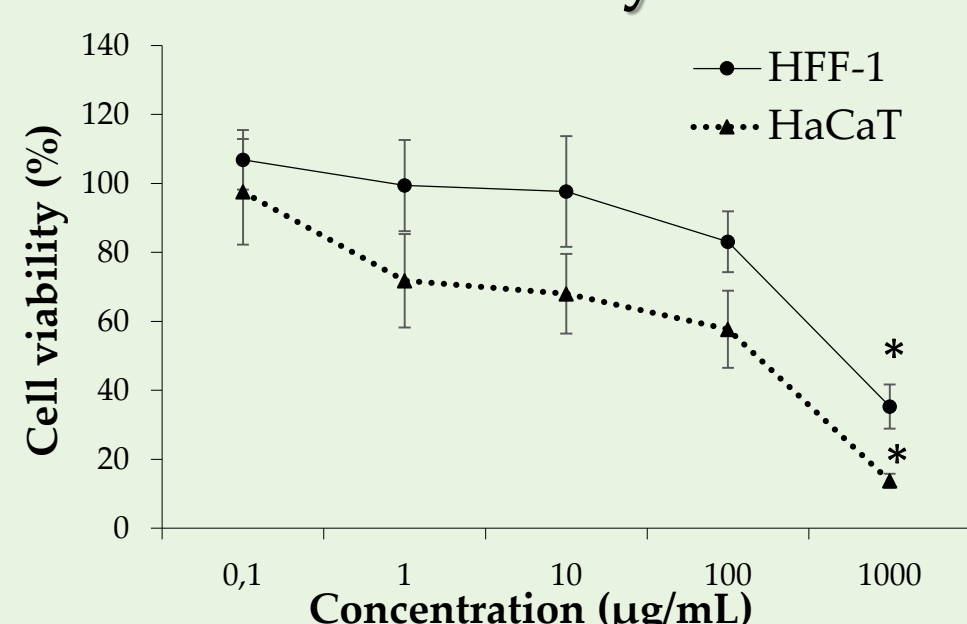

Figure 1. Effects of CS extract towards skin cells evaluated by MTT assay. \*  $p < 0.05$

### 4. Ex-vivo skin permeation of phenolic compounds

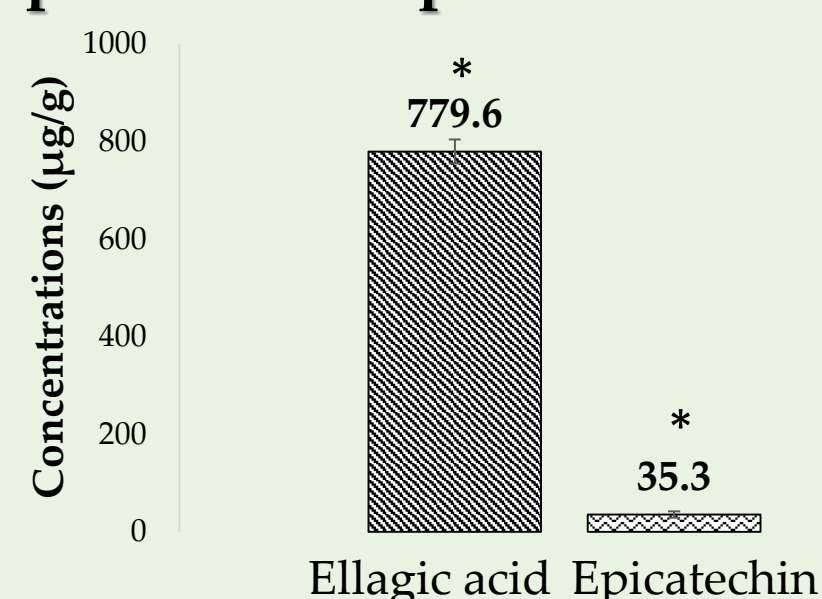

Figure 2. Permeation of polyphenols from CS extract through human skin. \*  $p < 0.05$

## DISCUSSION

### Valorisation of chestnut shells as a promising cosmetic ingredient

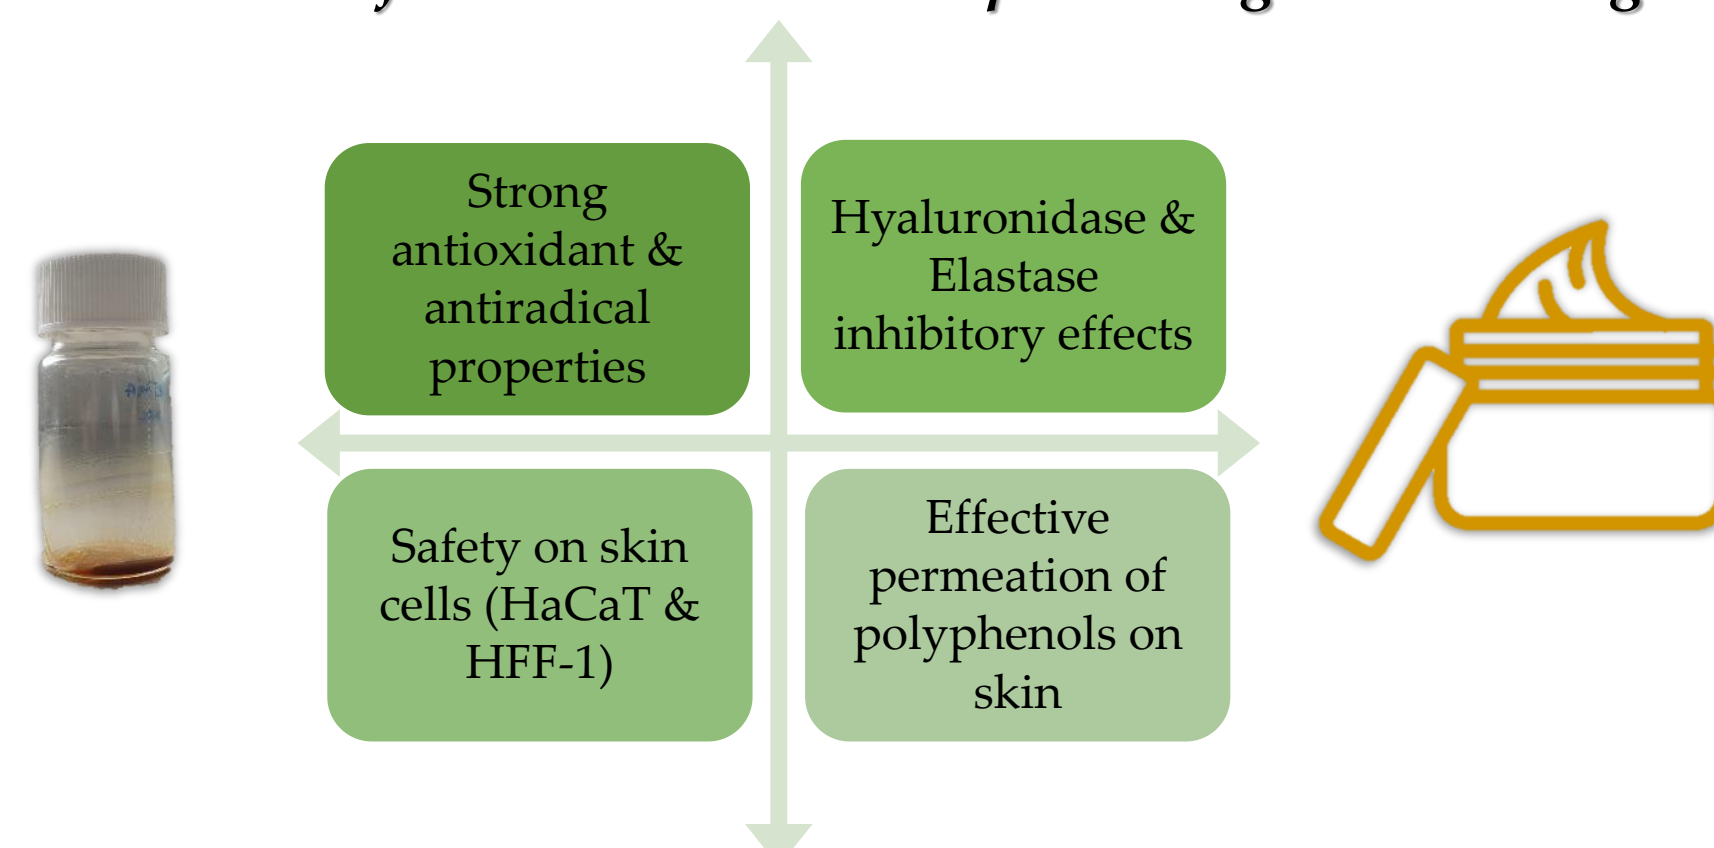

- The antioxidant & antiradical properties, as well as anti-hyaluronidase & anti-elastase effects suggest that CS extract may be a potential source of anti-aging ingredients probably due to the phenolic composition, mainly ellagic acid, caffeic acid derivative, catechin, epicatechin & epigallocatechin [3].
- The best scavenging efficiencies were achieved for NO<sup>•</sup> & HOCl.
- CS extract is safe for skin application in a concentration range of 0.1-100 µg/mL.
- The promising skin permeation outcomes revealed a slow penetration of polyphenols, namely ellagic acid & epicatechin, from CS extract into the skin, inducing a prolonged cosmetic effect.

## CONCLUSIONS

This study appraised a new cosmetic ingredient emphasizing its potential to be incorporated in cosmetic formulations as **anti-aging ingredient**, answering to the **sustainable development goals** of agenda 2030 of the United Nations & **European Regulation n.º 1223/2009**.

**Acknowledgements:** This research was funded by FCT/MCTES through national funds (UIDB/50006/2020) & project PTDC/ASP-AGR/29277/2017, co-supported by FEDER throughout COMPETE 2020 (POCI-01-0145-FEDER-029277). D. Pinto is thankful for her PhD grant (SFRH/BD/144534/2019) financed by FCT/MCTES, POPH-QREN, UE & Fundo Social Europeu. F. Rodrigues is thankful for her contract (CEECIND/01886/2020) financed by FCT/MCTES—CEEC Individual 2020 Program Contract.

### References:

- D. Pinto, M.d.l.L. Cádiz-Gurrea, A. Vallverdú-Queralt, C. Delerue-Matos, F. Rodrigues, Food Res. Int. 144 (2021) 110364.
- F. Rodrigues, J. Santos, F.B. Pimentel, N. Braga, A. Palmeira-de-Oliveira, M.B.P.P. Oliveira, Food Funct. 6 (2015) 2854-2860.
- D. Pinto, M.d.l.L. Cádiz-Gurrea, S. Sut, A.S. Ferreira, F.J. Leyva-Jimenez, S. Dall'Acqua, A. Segura-Carretero, C. Delerue-Matos, F. Rodrigues, J CO2 Util. (2020) 101194.
